# Supplementary material for: Unprecedented stability enhancement of multiply charged anions through decoration with negative electron affinity noble gases
Source: Royal Society of Chemistry journal article supplement (doi:10.1039/d0cp01478h), 2020-01-01
Supplement: d0cp01478h1.pdf [file d0cp01478h1.pdf]

**Electronic Supporting Information**

**Unprecedented stability enhancement of multiple charged anion through decoration  
with negative electron affinity noble gases**

Meenakshi Joshi<sup>a,b</sup> and Tapan K. Ghanty<sup>a,b,\*</sup>

<sup>a</sup>Theoretical Chemistry Section, Chemistry Group, Bhabha Atomic Research Centre, Mumbai  
400085, India.

<sup>b</sup>Homi Bhabha National Institute, Training School Complex, Anushakti Nagar, Mumbai–  
400094, India.

## Computational Details

In the present work, all the calculations are performed using Turbomole 7.2 program.<sup>[1]</sup> The  $B_{12}Ng_nF_{12}^{2-}$  ( $n = 1, 2, 3, 4$  and  $12$ ) systems are optimized using dispersion corrected<sup>[2]</sup> DFT (B3LYP–D3)<sup>[3]</sup> and MP2<sup>[4]</sup> methods. For all the atoms def2–TZVPP basis set is used along with 28–electron core ECP for Xe atom.<sup>[5]</sup> Frequency calculation is performed with B3LYP–D3 functional to obtain minimum energy structure. Charge distribution analysis is performed using natural population analysis (NPA) scheme.<sup>[6]</sup> Furthermore, to analyze the nature of chemical bond we, have performed the atoms–in–molecule (AIM) analysis<sup>[7]</sup> and electron localization function (ELF)<sup>[7c]</sup> analysis at B3LYP–D3/def2–TZVPP level employed with energy density function (EDF)<sup>[8]</sup> using Multiwfn program<sup>[9]</sup>. For  $B_{12}Ng_nF_{12}^{2-}$ , the dissociation energy (DE) has been calculated using B3LYP–D3 and MP2 methods. In addition to this the DE has been calculated by using DLPNO–CCSD(T) method<sup>[10]</sup> with def2–TZVPP<sup>[5a]</sup> basis set and def2–TZVPP/C<sup>[11a]</sup> auxiliary basis set as implemented in ORCA4.1.2 program.<sup>[11b]</sup> Moreover, energy decomposition analysis in conjunction with the natural orbital for chemical valence (EDA–NOCV)<sup>[12]</sup> has been performed with ADF2017 software<sup>[13a,13b]</sup> using B3LYP–D3 functional and TZ2P<sup>[13c]</sup> basis set on the B3LYP–D3/def2–TZVPP optimized geometry. Scalar relativistic effect<sup>[14]</sup> has been included in the EDA–NOCV calculations. In the EDA the total interaction energy ( $E^{\text{int}}$ ) between the interacting fragments is decomposed into four energy terms: the Pauli repulsion ( $E^{\text{Pauli}}$ ) between the occupied orbitals of the three fragments, the classical electrostatic attractive energy ( $E^{\text{elstat}}$ ) between the interacting fragments, the attractive orbital interaction energy ( $E^{\text{orb}}$ ) arising from the charge transfer and mixing of the occupied and unoccupied orbitals on the fragments and the polarization effect, and the dispersion energy ( $E^{\text{disp}}$ ). Moreover, in EDA–NOCV, total deformation density ( $\Delta\rho(r)$ ) is decomposed into its individual differential densities ( $\Delta\rho_i(r)$ ), ( $\Delta\rho(r) = \sum\Delta\rho_i(r)$ ) which can be represented in the pairs of NOCV. The NOCV pairs of deformation density give the direction of the charge density flow. Similarly, the total  $E^{\text{orb}}$  is decomposed into its individual  $\Delta E_i^{\text{orb}}$  ( $E^{\text{orb}} = \sum\Delta E_i^{\text{orb}}$ ) corresponding to each charge transfer channel.

## References

1. TURBOMOLE is program package developed by the Quantum Chemistry Group at the University of Karlsruhe, Germany, 1988: Ahlrichs, R.; Bär, M.; Häser, M.; Horn, H.; Kölmel, C. *Chem. Phys. Lett.* **1989**, *162*, 165–169.
2. a) S. Grimme, J. Antony, S. Ehrlich, H. A Krieg, *J. Chem. Phys.* **2010**, *132*, 154104. b) S. Grimme, A. Hansen, J. G. Brandenburg, C. Bannwarth, *Chem. Rev.* **2016**, *116*, 5105–5154.
3. a) A. D. Becke, *J. Chem. Phys.* **1993**, *98*, 1372–1377. b) C. Lee, W. Yang, R. G. Parr, *Phys. Rev. B* **1988**, *37*, 785–789. c) A. D. Becke, *Phys. Rev. A* **1988**, *38*, 3098–3100. d) C. Adamo, V. Barone, *J. Chem. Phys.* **1999**, *110*, 6158.
4. M. J. Frisch, M. Head–Gordon, J. A. Pople, *Chem. Phys. Lett.* **1990**, *166*, 275–280.
5. a) F. Weigenda, R. Ahlrichs, *Phys. Chem. Chem. Phys.* **2005**, *7*, 3297–3305. b) A. Schäfer, C. Huber, R. Ahlrichs, *J. Chem. Phys.* **1994**, *100*, 5829. c) K. A. Peterson, D. Figgen, E. Goll, H. Stoll, M. Dolg, *J. Chem. Phys.* **2003**, *119*, 11113.
6. A. E. Reed, R. B. Weinstock, F. A. Weinhold, *J. Chem. Phys.* **1985**, *83*, 735
7. a) R. F. W. Bader, *Atoms in Molecules—A Quantum Theory*; Oxford University Press: Oxford, U.K., **1990**. b) W. Zou, D. Nori–Shargh, Boggs, *J. Phys. Chem. A* **2013**, *117*, 207–212. c) A. D. Becke and K. E. Edgecombe, *J. Chem. Phys.* 1990, **92**, 5397.
8. T. A. Keith, M. J. Frisch, *J. Phys. Chem. A* **2011**, *115*, 12879–12894.
9. T. Lu, F. W. Chen, *J. Comput. Chem.* **2012**, *33*, 580–592.
10. (a) Riplinger, B. Sandhoefer, A. Hansen and F. Neese, *J. Chem. Phys.*, 2013, *139*, 134101. (b) C. Riplinger, P. Pinski, U. Becker, E. F. Valeev and F. Neese, *J. Chem. Phys.*, 2016, *144*, 024109. (c) D. G. Liakos, F. Neese, *J. Chem. Theory Comput.* **2015**, *11*, 4054–4063.
11. (a) A. Hellweg, C. Hattig, S. Hofener and W. Klopper, *Theor. Chem. Acc.* **2007**, *117*, 587. (b) F. Neese, F. Wennmohs, U. Becker, D. Bykov, D. Ganyushin, A. Hansen, R. Izsank, D. G. Liakos, C. Kollmar, S. Kossmann, D. A. Pantazis, ORCA, version 4.1.2; Max Planck Institute for Chemical Energy Conversion: Mülheim/Ruhr, Germany, 2014.
12. (a) T. Ziegler and A. Rauk, *Theor. Chim. Acta*, **1977**, *46*, 1–10. b) M. P. Mitoraj, A. Michalak, T. A. Ziegler, *J. Chem. Theory Comput.* **2009**, *5*, 962–975. c) M. P. Mitoraj, A. Michalak, *Organometallics* **2007**, *26*, 6576–6580.
13. a) ADF2017; SCM, Theoretical Chemistry, Vrije Universiteit: Amsterdam, The Netherlands. <http://www.scm.com>. b) G. te Velde, F. M. Bickelhaupt, S. A. van

- Gisbergen, C. Fonseca Guerra, E. J. Baerends, J. G. Snijders, T. Ziegler, *J. Comput. Chem.* **2001**, *22*, 931–967. c) E. van Lenthe, E. J. Baerends, *J. Comput. Chem.* **2003**, *24*, 1142–1156.
14. a) E. van Lenthe, E. J. Baerends, J. G. Snijders, *J. Chem. Phys.* **1994**, *101*, 9783–9792. b) E. van Lenthe, A. E. Ehlers, E. J. Baerends, *J. Chem. Phys.* **1999**, *110*, 8943–8953.

### **List of Tables**

**Table S1.** Binding Energy of First and Second Excess Electrons ( $\Delta E1$  and  $\Delta E2$ , in eV) in  $B_{12}F_{12}^{2-}$  and  $B_{12}Ng_nF_{12}^{2-}$  ( $Ng = Kr-Xe$  and  $n = 1, 2, 3, 4$  and  $12$ ) at B3LYP–D3/Def2–TZVPP Level of Theory.

**Table S2.** Optimized Ng–B and Ng–F Bond Distances (in Å) in  $B_{12}Ng_nF_{12}^{2-}$  ( $Ng = Ar-Xe$  and  $n = 1, 2, 3, 4$  and  $12$ ) using B3LYP–D3 and MP2 Methods and Dissociation Energy (DE, kcal mol<sup>-1</sup>) using B3LYP–D3 (B3), MP2 and DLPNO–CCSD(T)<sup>a</sup> Methods with def2–TZVPP Basis Set. Covalent Ng–B and Ng–F Radii<sup>b</sup> Reported by Cordero et al<sup>c</sup> [Pyykkö<sup>d</sup>] are also Provided in the Table.

**Table S3.** Calculated NPA Charge on Ng, B and F atoms in  $B_{12}F_{12}^{2-}$  and  $B_{12}Ng_nF_{12}^{2-}$  ( $Ng = Ar-Xe$  and  $n = 1, 2, 3, 4$  and  $12$ ) at B3LYP–D3/def2–TZVPP Level of Theory.

**Table S4.** Free Energy Change ( $\Delta G$ , kcal mol<sup>-1</sup>) of  $B_{12}Ng_nF_{12}^{2-}$  ( $Ng = Ar-Xe$  and  $n = 1, 2, 3, 4, 12$ ) at 298.15 K along Path1 and Path2 Dissociation channels at B3LYP–D3/def2–TZVPP Level of Theory.

**Table S5:** Calculated Values of Dissociation Energy (DE, in kcal mol<sup>-1</sup>) and Free energy of Dissociation ( $\Delta G$  at 298.15 K, in kcal mol<sup>-1</sup>) of  $B_{12}Ng_nF_{12}^{2-}$  ( $Ng = Ar, Kr, Xe$  and  $n = 1, 2, 3, 4, 12$ ) along Path3 and Path4 using B3LYP–D3/def2–TZVPP Method.

**Table S6:** Calculated Values of Optimized Bond Length (in Å), B1–Ng–F Bond Angle (in Degree) and Activation Energy Barrier (AE, in kcal mol<sup>-1</sup>) of Transition State Structure (along B1–Ng–F mode) of  $B_{12}Ng_nF_{12}^{2-}$  ( $Ng = Kr, Xe$  and  $n = 1, 2, 3, 4, 12$ ) using B3LYP–D3/def2–TZVPP Method.

**Table S7.** Bond Critical Point (BCP) Properties of Ng–B (Ng–F) Bond of  $B_{12}Ng_nF_{12}^{2-}$  (Ng = Kr–Xe and n = 1, 12) Compounds at B3LYP–D3/def2–TZVPP Level of Theory. BCP Properties of Ng–F Bond are Reported in the Parenthesis.

**Table S8.** EDA–NOCV of  $B_{12}Ng_nF_{12}^{2-}$  (Ng = Kr–Xe and n = 1, 12) Along Path1 and Path2 at B3LYP–D3/TZ2P Level of Theory. The Percent Contribution of Stabilizing Energy Terms ( $E^{\text{elstat}} + E^{\text{orb}} + E^{\text{disp}}$ ) to the Total Interaction Energy ( $E^{\text{int}}$ ) is provided in the parenthesis. All Energy Terms are in kcal mol<sup>-1</sup>.

### **List of Figures**

**Figure S1.** Optimized structures of  $B_{12}Xe_nF_{12}^{2-}$  (n = 2–4, 12) compound and relative energy (RE, in kcal mol<sup>-1</sup>) of different isomers with respect to its corresponding most stable isomer.

**Figure S2.** DOS of  $B_{12}Xe_{12}F_{12}^{2-/-/0}$  and  $B_{12}Kr_{12}F_{12}^{2-/-/0}$  systems using B3LYP-D3/def2-TZVPP method. Vertical arrows are pointing toward HOMO.

**Figure S3.** MOs energy level diagram of  $B_{12}Kr_{12}F_{12}^{2-/-/0}$  using B3LYP-D3/def2-TZVPP method. The red and blue lines correspond to the alpha and beta orbitals respectively, of  $B_{12}Kr_{12}F_{12}^{(-)}$  system.

**Figure S4.** MOs energy level diagram of  $B_{12}Xe_{12}F_{12}^{2-/-/0}$  using B3LYP-D3/def2-TZVPP method. The red and blue lines correspond to the alpha and beta orbitals respectively, of  $B_{12}Xe_{12}F_{12}^{(-)}$  system.

**Figure S5.** Scaled MOs energy level diagram of  $B_{12}Kr_{12}F_{12}^{2-/-/0}$  using B3LYP-D3/def2-TZVPP method. The red and blue lines correspond to the alpha and beta orbitals respectively, of  $B_{12}Kr_{12}F_{12}^{(-)}$  system. The orbital energies of the negative and neutral systems are scaled by keeping the energy of the highest occupied molecular orbitals (HOMO) of  $B_{12}Kr_{12}F_{12}^{(-)}$  and  $B_{12}Kr_{12}F_{12}$  to that of the HOMO of  $B_{12}Kr_{12}F_{12}^{2-}$  system.

**Figure S6.** Scaled MOs energy level diagram of  $B_{12}Xe_{12}F_{12}^{2-/0}$  using B3LYP-D3/def2-TZVPP method. The red and blue lines correspond to the alpha and beta orbitals respectively, of  $B_{12}Xe_{12}F_{12}^{(-)}$  system. The orbital energies of the negative and neutral systems are scaled by keeping the energy of the highest occupied molecular orbitals (HOMO) of  $B_{12}Xe_{12}F_{12}^{(-)}$  and  $B_{12}Xe_{12}F_{12}$  to that of the HOMO of  $B_{12}Xe_{12}F_{12}^{2-}$  system.

**Figure S7.** MOs pictures of lowest unoccupied molecular orbital (LUMO), highest occupied molecular orbital (HOMO), singly occupied molecular orbital (SOMO) and additional 10 outer valence occupied molecular orbitals of  $B_{12}Kr_{12}F_{12}^{(2-)}$  and  $B_{12}Kr_{12}F_{12}^{(-)}$  systems using B3LYP-D3/def2-TZVPP method.

**Figure S8.** MOs pictures of LUMO, HOMO, SOMO and additional 10 outer valence occupied molecular orbitals of  $B_{12}Kr_{12}F_{12}^{(-)}$  and  $B_{12}Kr_{12}F_{12}$  systems using B3LYP-D3/def2-TZVPP method.

**Figure S9.** MOs pictures of LUMO, HOMO, SOMO and additional 10 outer valence occupied molecular orbitals of  $B_{12}Xe_{12}F_{12}^{(2-)}$  and  $B_{12}Xe_{12}F_{12}^{(-)}$  systems using B3LYP-D3/def2-TZVPP method.

**Figure S10.** MOs pictures of LUMO, HOMO, SOMO and additional 10 outer valence occupied molecular orbitals of  $B_{12}Xe_{12}F_{12}^{(-)}$  and  $B_{12}Xe_{12}F_{12}$  systems using B3LYP-D3/def2-TZVPP method.

**Figure S11.** Dissociation energy (DE, kcal mol<sup>-1</sup>) plot of  $B_{12}Kr_nF_{12}^{2-}$  (n = 1, 2, 3, 4, 12) along Path1 and Path2 dissociation channels using B3LYP-D3, MP2 and DLPNO-CCSD(T) methods with def2-TZVPP basis set.

**Figure S12.** Deformation density ( $\Delta\rho(r)$ ) pictures of the pairwise orbital interactions for  $B_{12}Kr_nF_{12}^{2-}$  (n = 1 and 12) along Path1 and Path2 and their associated  $\Delta E_i^{\text{orb}}$  energies ( $\Delta E^\sigma$  and  $\Delta E^\pi$ , in kcal mol<sup>-1</sup>) obtained from the EDA-NOCV at B3LYP-D3/TZ2P level of theory. The blue and red colored surfaces indicate regions with  $\Delta\rho(r) > 0$  and  $\Delta\rho(r) < 0$ , respectively.

**Figure S13.** Deformation density ( $\Delta\rho(r)$ ) pictures of the pairwise orbital interactions for  $B_{12}Xe_nF_{12}^{2-}$  ( $n = 1$  and  $12$ ) along Path1 and Path2 and their associated  $\Delta E_i^{\text{orb}}$  energies ( $\Delta E^\sigma$  and  $\Delta E^\pi$ , in  $\text{kcal mol}^{-1}$ ) obtained from the EDA–NOCV at B3LYP–D3/TZ2P level of theory. The blue and red colored surfaces indicate regions with  $\Delta\rho(r) > 0$  and  $\Delta\rho(r) < 0$ , respectively.

**Table S1. Binding Energy of First and Second Excess Electrons ( $\Delta E1$  and  $\Delta E2$ , in eV) in  $B_{12}F_{12}^{2-}$  and  $B_{12}Ng_nF_{12}^{2-}$  ( $Ng = Kr-Xe$  and  $n = 1, 2, 3, 4$  and  $12$ ) at B3LYP-D3/Def2-TZVPP Level of Theory**

| Dianions                         | $\Delta E1$ |      | $\Delta E2$ |      |
|----------------------------------|-------------|------|-------------|------|
|                                  | Kr          | Xe   | Kr          | Xe   |
| $B_{12}F_{12}^{2-}$              | 5.51        |      | 1.31        |      |
| $B_{12}NgF_{12}^{2-}$            | 6.21        | 6.05 | 2.15        | 2.07 |
| $1,12-B_{12}Ng_2F_{12}^{2-}$     | 6.94        | 6.40 | 2.53        | 2.70 |
| $1,2,12-B_{12}Ng_3F_{12}^{2-}$   | 7.47        | 6.76 | 2.79        | 3.07 |
| $1,2,7,12-B_{12}Ng_4F_{12}^{2-}$ | 7.69        | 7.05 | 3.16        | 3.37 |
| $B_{12}Ng_{12}F_{12}^{2-}$       | 8.47        | 7.87 | 5.22        | 5.15 |



**Table S2. Optimized Ng–B and Ng–F Bond Distances (in Å) in  $B_{12}Ng_nF_{12}^{2-}$  (Ng = Ar–Xe and n = 1, 2, 3, 4 and 12) using B3LYP–D3 and MP2 Methods and Dissociation Energy (DE, kcal mol<sup>-1</sup>) using B3LYP–D3 (B3), MP2 and DLPNO–CCSD(T)<sup>a</sup> Methods with def2–TZVPP Basis Set. Covalent Ng–B and Ng–F Radii<sup>b</sup> Reported by Cordero et al<sup>c</sup> [Pyykkö<sup>d</sup>] are also Provided in the Table**

| $B_{12}Ng_nF_{12}^{2-}$          | Ng–B             |                  | Ng–F             |                  | DE Along PATH1 |      |               | DE Along PATH2 |      |               |
|----------------------------------|------------------|------------------|------------------|------------------|----------------|------|---------------|----------------|------|---------------|
|                                  | B3               | MP2              | B3               | MP2              | B3             | MP2  | DLPNO–CCSD(T) | B3             | MP2  | DLPNO–CCSD(T) |
| $R_{cov(Ar-B)/(Ar-F)}$           | 1.900<br>[1.810] | 1.900<br>[1.810] | 1.630<br>[1.600] | 1.630<br>[1.600] |                |      |               |                |      |               |
| $B_{12}ArF_{12}^{2-}$            | 1.950            | 1.862            | 2.304            | 2.311            | 54.8           | 55.2 | 46.1          | 4.2            | 7.1  | 3.0           |
| $1,7-B_{12}Ar_2F_{12}^{2-}$      | 1.946            | 1.853            | 2.253            | 2.246            | 46.1           | 45.5 | 36.2          | 13.9           | 21.0 | 7.6           |
| $1,12-B_{12}Ar_2F_{12}^{2-}$     | 1.943            | 1.854            | 2.255            | 2.251            | 47.3           | 47.0 | 36.8          | 17.5           | 21.2 | 17.1          |
| $1,2,12-B_{12}Ar_3F_{12}^{2-}$   | 1.948            | 1.850            | 2.207            | 2.182            | 35.4           | 34.1 | 24.6          | 23.7           | 32.0 | 28.2          |
| $1,7,12-B_{12}Ar_3F_{12}^{2-}$   | 1.947            | 1.850            | 2.207            | 2.183            | 40.6           | 39.0 | 29.3          | 24.4           | 32.1 | 28.8          |
| $1,2,7,12-B_{12}Ar_4F_{12}^{2-}$ | 1.958            | 1.853            | 2.173            | 2.126            | ...*           | 29.1 | 22.9          | 28.7           | 39.7 | 35.2          |
| $B_{12}Ar_{12}F_{12}^{2-}$       | 2.005            | ...*             | 2.060            | ...*             | 3.0            | ...* | ...*          | 61.2           | ...* | 71.8          |
| $R_{cov(Kr-B)/(Kr-F)}$           | 2.000<br>[2.020] | 2.000<br>[2.020] | 1.730<br>[1.810] | 1.730<br>[1.810] |                |      |               |                |      |               |
| $B_{12}KrF_{12}^{2-}$            | 2.098            | 2.011            | 2.339            | 2.322            | 64.6           | 67.3 | 57.9          | 14.0           | 19.2 | 14.7          |
| $1,7-B_{12}Kr_2F_{12}^{2-}$      | 2.096            | 2.009            | 2.296            | 2.270            | 57.6           | 60.0 | 50.2          | 23.5           | 31.2 | 27.8          |
| $1,12-B_{12}Kr_2F_{12}^{2-}$     | 2.094            | 2.009            | 2.297            | 2.274            | 58.4           | 60.6 | 50.4          | 26.3           | 31.8 | 27.6          |
| $1,2,12-B_{12}Kr_3F_{12}^{2-}$   | 2.096            | 2.011            | 2.255            | 2.220            | 49.3           | 60.0 | 41.4          | 32.6           | 41.0 | 37.3          |
| $1,7,12-B_{12}Kr_3F_{12}^{2-}$   | 2.096            | 2.011            | 2.255            | 2.220            | 53.0           | 55.2 | 44.7          | 33.2           | 41.0 | 37.7          |
| $1,2,7,12-B_{12}Kr_4F_{12}^{2-}$ | 2.101            | 2.018            | 2.222            | 2.177            | 45.6           | 48.6 | 37.8          | 38.0           | 47.8 | 44.5          |
| $B_{12}Kr_{12}F_{12}^{2-}$       | 2.130            | 2.084            | 2.113            | 2.062            | 25.7           | 35.6 | 19.6          | 72.0           | 77.2 | 81.7          |
| $R_{cov(Xe-B)/(Xe-F)}$           | 2.240<br>[2.160] | 2.240<br>[2.160] | 1.970<br>[1.950] | 1.970<br>[1.950] |                |      |               |                |      |               |
| $B_{12}XeF_{12}^{2-}$            | 2.270            | 2.178            | 2.371            | 2.350            | 78.7           | 86.7 | 74.3          | 28.1           | 38.5 | 31.1          |
| $1,7-B_{12}Xe_2F_{12}^{2-}$      | 2.268            | 2.179            | 2.340            | 2.315            | 73.6           | 81.7 | 69.7          | 36.3           | 48.3 | 41.7          |
| $1,12-B_{12}Xe_2F_{12}^{2-}$     | 2.268            | 2.179            | 2.341            | 2.316            | 73.9           | 81.7 | 69.2          | 38.8           | 49.5 | 42.3          |
| $1,2,12-B_{12}Xe_3F_{12}^{2-}$   | 2.271            | 2.184            | 2.308            | 2.280            | 67.8           | 76.6 | 63.5          | 43.6           | 56.6 | 49.7          |
| $1,7,12-B_{12}Xe_3F_{12}^{2-}$   | 2.271            | 2.184            | 2.287            | 2.280            | 70.0           | 78.1 | 65.4          | 44.7           | 56.8 | 50.3          |
| $1,2,7,12-B_{12}Xe_4F_{12}^{2-}$ | 2.277            | 2.190            | 2.282            | 2.250            | 65.1           | 74.2 | 60.9          | 49.0           | 62.8 | 56.3          |
| $B_{12}Xe_{12}F_{12}^{2-}$       | 2.302            | 2.222            | 2.189            | 2.157            | 51.4           | 65.6 | 47.9          | 81.1           | 99.0 | 91.0          |

<sup>a</sup>Single point energy calculation is performed using DLPNO–CCSD(T) method on B3LYP–D3 optimized geometry

\*Structure did not converge

<sup>b</sup> $R_{cov(Ng-B)} = R_{cov(Ng)} + R_{cov(B)}$  and  $R_{cov(Ng-F)} = R_{cov(Ng)} + R_{cov(F)}$

<sup>c</sup>B. Cordero, V. Gómez, Ana E. Platero-Prats, M. Revés, J. Echeverría, E. Cremades, F. Barragán, S. Alvarez, *Dalton Trans.* **2008**, 2832–2838. <sup>d</sup>P. Pyykkö, *J. Phys. Chem. A* **2015**, 119, 11, 2326–2337.

**Table S3. Calculated NPA Charge on Ng, B and F atoms in  $B_{12}F_{12}^{2-}$  and  $B_{12}Ng_nF_{12}^{2-}$  (Ng = Ar–Xe and n = 1, 2, 3, 4, 12) at B3LYP–D3/def2–TZVPP Level of Theory**

| $B_{12}Ng_nF_{12}^{2-}$          | $q_{tot}B$ | $q_{tot}F$ | $q_{tot}B+F$ | $q_{tot}Ng$ | $q_{avg}B$ | $q_{avg}F$ | $q_{avg}Ng$ |
|----------------------------------|------------|------------|--------------|-------------|------------|------------|-------------|
| $B_{12}F_{12}^{2-}$              | 3.64       | −5.64      | −2.00        | ...         | 0.30       | −0.46      | ...         |
| $B_{12}ArF_{12}^{2-}$            | 3.37       | −5.89      | −2.52        | 0.52        | −0.11      | −0.88      | 0.52        |
| $1,7-B_{12}Ar_2F_{12}^{2-}$      | 3.10       | −6.16      | −3.06        | 1.06        | −0.13      | −0.85      | 0.53        |
| $1,12-B_{12}Ar_2F_{12}^{2-}$     | 3.10       | −6.16      | −3.06        | 1.07        | −0.12      | −0.86      | 0.53        |
| $1,2,12-B_{12}Ar_3F_{12}^{2-}$   | 2.77       | −6.40      | −3.63        | 1.63        | −0.13      | −0.82      | 0.54        |
| $1,7,12-B_{12}Ar_3F_{12}^{2-}$   | 2.77       | −6.40      | −3.63        | 1.63        | −0.13      | −0.82      | 0.54        |
| $1,2,7,12-B_{12}Ar_4F_{12}^{2-}$ | 2.42       | −6.60      | −4.18        | 2.18        | −0.12      | −0.78      | 0.54        |
| $B_{12}Ar_{12}F_{12}^{2-}$       | −0.72      | −7.85      | −8.57        | 6.57        | −0.06      | −0.65      | 0.55        |
| $B_{12}KrF_{12}^{2-}$            | 3.27       | −5.90      | −2.63        | 0.63        | −0.21      | −0.86      | 0.63        |
| $1,7-B_{12}Kr_2F_{12}^{2-}$      | 2.90       | −6.18      | −3.28        | 1.29        | −0.23      | −0.84      | 0.64        |
| $1,12-B_{12}Kr_2F_{12}^{2-}$     | 2.90       | −6.19      | −3.29        | 1.29        | −0.23      | −0.85      | 0.64        |
| $1,2,12-B_{12}Kr_3F_{12}^{2-}$   | 2.47       | −6.45      | −3.98        | 1.98        | −0.23      | −0.82      | 0.66        |
| $1,7,12-B_{12}Kr_3F_{12}^{2-}$   | 2.47       | −6.45      | −3.98        | 1.98        | −0.23      | −0.82      | 0.66        |
| $1,2,7,12-B_{12}Kr_4F_{12}^{2-}$ | 2.03       | −6.70      | −4.67        | 2.67        | −0.22      | −0.80      | 0.67        |
| $B_{12}Kr_{12}F_{12}^{2-}$       | −1.92      | −8.44      | −10.36       | 8.36        | −0.16      | −0.70      | 0.70        |
| $B_{12}XeF_{12}^{2-}$            | 3.16       | −5.92      | −2.76        | 0.76        | −0.33      | −0.86      | 0.76        |
| $1,7-B_{12}Xe_2F_{12}^{2-}$      | 2.67       | −6.23      | −3.56        | 1.56        | −0.34      | −0.84      | 0.78        |
| $1,12-B_{12}Xe_2F_{12}^{2-}$     | 2.66       | −6.23      | −3.57        | 1.56        | −0.34      | −0.84      | 0.78        |
| $1,2,12-B_{12}Xe_3F_{12}^{2-}$   | 2.14       | −6.53      | −4.39        | 2.39        | −0.33      | −0.83      | 0.80        |
| $1,7,12-B_{12}Xe_3F_{12}^{2-}$   | 2.14       | −6.53      | −4.39        | 2.39        | −0.33      | −0.83      | 0.80        |
| $1,2,7,12-B_{12}Xe_4F_{12}^{2-}$ | 1.59       | −6.82      | −5.23        | 3.24        | −0.31      | −0.81      | 0.81        |
| $B_{12}Xe_{12}F_{12}^{2-}$       | −3.26      | −9.03      | −12.29       | 10.29       | −0.27      | −0.75      | 0.86        |

Table S4. Free Energy Change ( $\Delta G$ , kcal mol<sup>-1</sup>) of  $B_{12}Ng_nF_{12}^{2-}$  (Ng = Ar–Xe and n = 1, 2, 3, 4, 12) at 298.15 K along Path1 and Path2 Dissociation channels at B3LYP–D3/def2–TZVPP Level of Theory.

| $B_{12}Ng_nF_{12}^{2-}$          | $\Delta G$         |                    |
|----------------------------------|--------------------|--------------------|
|                                  | Path1 <sup>a</sup> | Path2 <sup>b</sup> |
| $B_{12}ArF_{12}^{2-}$            | 38.0               | -15.0              |
| $1,7-B_{12}Ar_2F_{12}^{2-}$      | 28.9               | -4.0               |
| $1,12-B_{12}Ar_2F_{12}^{2-}$     | 30.3               | -1.3               |
| $1,2,12-B_{12}Ar_3F_{12}^{2-}$   | 17.7               | 5.5                |
| $1,7,12-B_{12}Ar_3F_{12}^{2-}$   | 23.4               | 6.4                |
| $1,2,7,12-B_{12}Ar_4F_{12}^{2-}$ | *                  | 10.5               |
| $B_{12}Ar_{12}F_{12}^{2-}$       | -21.0              | 40.7               |
|                                  |                    |                    |
| $B_{12}KrF_{12}^{2-}$            | 47.8               | -5.2               |
| $1,7-B_{12}Kr_2F_{12}^{2-}$      | 40.4               | 5.5                |
| $1,12-B_{12}Kr_2F_{12}^{2-}$     | 41.3               | 7.4                |
| $1,2,12-B_{12}Kr_3F_{12}^{2-}$   | 31.8               | 14.5               |
| $1,7,12-B_{12}Kr_3F_{12}^{2-}$   | 35.8               | 15.3               |
| $1,2,7,12-B_{12}Kr_4F_{12}^{2-}$ | 28.1               | 20.3               |
| $B_{12}Kr_{12}F_{12}^{2-}$       | 5.2                | 51.4               |
|                                  |                    |                    |
| $B_{12}XeF_{12}^{2-}$            | 61.7               | 8.7                |
| $1,7-B_{12}Xe_2F_{12}^{2-}$      | 56.4               | 18.3               |
| $1,12-B_{12}Xe_2F_{12}^{2-}$     | 56.8               | 19.8               |
| $1,2,12-B_{12}Xe_3F_{12}^{2-}$   | 50.4               | 25.7               |
| $1,7,12-B_{12}Xe_3F_{12}^{2-}$   | 52.8               | 26.8               |
| $1,2,7,12-B_{12}Xe_4F_{12}^{2-}$ | 47.7               | 31.4               |
| $B_{12}Xe_{12}F_{12}^{2-}$       | 30.7               | 60.4               |

<sup>a</sup>Path1:  $B_{12}Ng_nF_{12}^{2-}$

<sup>b</sup>Path2:  $B_{12}Ng_nF_{12}^{2-}$

Ng + F +  $B_{12}Ng_{n-1}F_{11}^{2-}$

Ng + F +  $B_{12}Ng_{n-1}F_{11}^{2-}$

**Table S5: Calculated Values of Dissociation Energy (DE, in kcal mol<sup>-1</sup>) and Free energy of Dissociation ( $\Delta G$  at 298.15 K, in kcal mol<sup>-1</sup>) of  $B_{12}Ng_nF_{12}^{2-}$  (Ng = Ar, Kr, Xe and n = 1, 2, 3, 4, 12) along Path3 and Path4 using B3LYP-D3/def2-TZVPP Method.**

| $B_{12}Ng_nF_{12}^{2-}$          | Path3                                                       |                                | Path4                                                              |            |
|----------------------------------|-------------------------------------------------------------|--------------------------------|--------------------------------------------------------------------|------------|
|                                  | $B_{12}Ng_nF_{12}^{2-} \rightarrow B_{12}F_{12}^{2-} + nNg$ |                                | $B_{12}Ng_nF_{12}^{2-} \rightarrow B_{12}Ng_{n-1}F_{12}^{2-} + Ng$ |            |
|                                  | DE per Ng <sup>1</sup>                                      | $\Delta G$ per Ng <sup>2</sup> | DE                                                                 | $\Delta G$ |
| $B_{12}ArF_{12}^{2-}$            | -92.67                                                      | -41.91                         | -92.67                                                             | -41.91     |
| $1,12-B_{12}Ar_2F_{12}^{2-}$     | -96.07                                                      | -73.67                         | -99.47                                                             | -105.43    |
| $1,2,12-B_{12}Ar_3F_{12}^{2-}$   | -100.41                                                     | -87.83                         | -109.10                                                            | -116.15    |
| $1,7,12-B_{12}Ar_3F_{12}^{2-}$   | -100.41                                                     | -87.83                         | -109.10                                                            | -116.14    |
| $1,2,7,12-B_{12}Ar_4F_{12}^{2-}$ | -104.25                                                     | -96.57                         | -115.75                                                            | -122.80    |
| $B_{12}Ar_{12}F_{12}^{2-}$       | -120.60                                                     | -122.95                        | -138.16                                                            | -146.39    |
|                                  |                                                             |                                |                                                                    |            |
| $B_{12}KrF_{12}^{2-}$            | -82.67                                                      | -32.15                         | -82.67                                                             | -32.15     |
| $1,12-B_{12}Kr_2F_{12}^{2-}$     | -85.47                                                      | -63.31                         | -88.26                                                             | -94.46     |
| $1,2,12-B_{12}Kr_3F_{12}^{2-}$   | -89.04                                                      | -76.69                         | -96.18                                                             | -103.47    |
| $1,7,12-B_{12}Kr_3F_{12}^{2-}$   | -89.03                                                      | -76.69                         | -96.17                                                             | -103.45    |
| $1,2,7,12-B_{12}Kr_4F_{12}^{2-}$ | -92.24                                                      | -84.82                         | -101.85                                                            | -109.23    |
| $B_{12}Kr_{12}F_{12}^{2-}$       | -105.99                                                     | -108.69                        | -120.51                                                            | -129.16    |
|                                  |                                                             |                                |                                                                    |            |
| $B_{12}XeF_{12}^{2-}$            | -68.59                                                      | -18.21                         | -68.59                                                             | -18.21     |
| $1,12-B_{12}Xe_2F_{12}^{2-}$     | -70.67                                                      | -48.63                         | -72.75                                                             | -79.04     |
| $1,2,12-B_{12}Xe_3F_{12}^{2-}$   | -73.37                                                      | -61.14                         | -78.79                                                             | -86.17     |
| $1,7,12-B_{12}Xe_3F_{12}^{2-}$   | -73.38                                                      | -61.15                         | -78.80                                                             | -86.20     |
| $1,2,7,12-B_{12}Xe_4F_{12}^{2-}$ | -75.88                                                      | -68.61                         | -83.40                                                             | -90.99     |
| $B_{12}Xe_{12}F_{12}^{2-}$       | -86.71                                                      | -89.68                         | -98.31                                                             | -107.37    |

<sup>1</sup> DE = DE<sup>total</sup> /No of dissociated Ng atom, DE<sup>total</sup> = E( $B_{12}F_{12}^{2-}$ )+n\*E(Ng)-E( $B_{12}Ng_nF_{12}^{2-}$ )  
<sup>2</sup> $\Delta G$  =  $\Delta G$ <sup>total</sup> /No of dissociated Ng atom,  $\Delta G$ <sup>total</sup> = G( $B_{12}F_{12}^{2-}$ )+n\*G(Ng)-G( $B_{12}Ng_nF_{12}^{2-}$ )”

**Table S6: Calculated Values of Optimized Bond Length (in Å), B-Ng-F Bond Angle (in Degree) and Activation Energy Barrier (AE, in kcal mol<sup>-1</sup>) of Transition State Structure (along B1-Ng-F mode) of B<sub>12</sub>Ng<sub>n</sub>F<sub>12</sub><sup>2-</sup> (Ng = Kr, Xe and n = 1, 2, 3, 4, 12) using B3LYP-D3/def2-TZVPP Method.**

| TS-B <sub>12</sub> Ng <sub>n</sub> F <sub>12</sub> <sup>2-</sup>       | B-Ng  | Ng-F  | B-Ng-F | AE    |
|------------------------------------------------------------------------|-------|-------|--------|-------|
| B <sub>12</sub> KrF <sub>12</sub> <sup>2-</sup>                        | 2.155 | 2.570 | 81.01  | 25.52 |
| 1,12-B <sub>12</sub> Kr <sub>2</sub> F <sub>12</sub> <sup>2-</sup>     | 2.104 | 2.542 | 85.88  | 24.50 |
| 1,2,12-B <sub>12</sub> Kr <sub>3</sub> F <sub>12</sub> <sup>2-</sup>   | 2.083 | 2.506 | 87.67  | 22.89 |
| 1,2,7,12-B <sub>12</sub> Kr <sub>4</sub> F <sub>12</sub> <sup>2-</sup> | 2.069 | 2.490 | 91.19  | 22.49 |
| B <sub>12</sub> Kr <sub>12</sub> F <sub>12</sub> <sup>2-</sup>         | 2.093 | 2.344 | 117.33 | 16.33 |
|                                                                        |       |       |        |       |
| B <sub>12</sub> XeF <sub>12</sub> <sup>2-</sup>                        | 2.347 | 2.581 | 71.70  | 32.52 |
| 1,12-B <sub>12</sub> Xe <sub>2</sub> F <sub>12</sub> <sup>2-</sup>     | 2.330 | 2.567 | 70.92  | 31.47 |
| 1,2,12-B <sub>12</sub> Xe <sub>3</sub> F <sub>12</sub> <sup>2-</sup>   | 2.301 | 2.520 | 74.12  | 30.21 |
| 1,2,7,12-B <sub>12</sub> Xe <sub>4</sub> F <sub>12</sub> <sup>2-</sup> | 2.266 | 2.511 | 83.93  | 29.67 |
| B <sub>12</sub> Xe <sub>12</sub> F <sub>12</sub> <sup>2-</sup>         | 2.267 | 2.432 | 114.42 | 21.23 |

**Table S7. Bond Critical Point (BCP) Properties of Ng-B (Ng-F) Bond of B<sub>12</sub>Ng<sub>n</sub>F<sub>12</sub><sup>2-</sup> (Ng = Kr-Xe and n = 1, 12) Compounds at B3LYP-D3/def2-TZVPP Level of Theory. BCP Properties of Ng-F Bond are Reported in the Parenthesis**

| B <sub>12</sub> Ng <sub>n</sub> F <sub>12</sub> <sup>2-</sup>  | ρ           | ∇ <sup>2</sup> ρ | V(r)          | E <sub>d</sub> (r) | ELF         |
|----------------------------------------------------------------|-------------|------------------|---------------|--------------------|-------------|
| B <sub>12</sub> KrF <sub>12</sub> <sup>2-</sup>                | 0.09 (0.05) | -0.09 (0.18)     | -0.11 (-0.05) | -0.06 (0.00)       | 0.58 (0.14) |
| B <sub>12</sub> Kr <sub>12</sub> F <sub>12</sub> <sup>2-</sup> | 0.10 (0.08) | -0.10 (0.25)     | -0.08 (-0.09) | -0.05 (-0.02)      | 0.83 (0.25) |
| B <sub>12</sub> XeF <sub>12</sub> <sup>2-</sup>                | 0.09 (0.06) | -0.10 (0.17)     | -0.07 (-0.06) | -0.05 (-0.01)      | 0.83 (0.18) |
| B <sub>12</sub> Xe <sub>12</sub> F <sub>12</sub> <sup>2-</sup> | 0.09 (0.08) | -0.08 (0.21)     | -0.06 (-0.10) | -0.04 (-0.02)      | 0.87 (0.27) |

**Table S8. EDA–NOCV of  $B_{12}Ng_nF_{12}^{2-}$  ( $Ng = Kr-Xe$  and  $n = 1, 12$ ) Along Path1 and Path2 at B3LYP–D3/TZ2P Level of Theory. The Percent Contribution of Stabilizing Energy Terms ( $E^{elstat} + E^{orb} + E^{disp}$ ) to the Total Interaction Energy ( $E^{int}$ ) is provided in the parenthesis. All Energy Terms are in  $kcal\ mol^{-1}$**

| $B_{12}Ng_nF_{12}^{2-}$    | Path  | $E^{Pauli}$ | $E^{elstat}$     | $E^{orb}$        | $E^{disp}$     | $E^{def}$ | $E^{int}$ |
|----------------------------|-------|-------------|------------------|------------------|----------------|-----------|-----------|
| $B_{12}KrF_{12}^{2-}$      | Path1 | 222.2       | -124.0<br>(41.7) | -168.5<br>(56.7) | -4.6<br>(1.5)  | 0.9       | -74.1     |
|                            | Path2 | 107.9       | -11.5<br>(9.0)   | -111.6<br>(87.4) | -4.6<br>(3.6)  | 7.9       | -12.0     |
| $B_{12}Kr_{12}F_{12}^{2-}$ | Path1 | 238.9       | -113.9<br>(41.4) | -154.1<br>(56.0) | -7.3<br>(2.7)  | 0.6       | -35.8     |
|                            | Path2 | 209.9       | -95.3<br>(33.0)  | -186.4<br>(64.5) | -7.3<br>(2.5)  | 6.0       | -73.1     |
| $B_{12}XeF_{12}^{2-}$      | Path1 | 241.8       | -138.3<br>(42.1) | -185.1<br>(56.3) | -5.3<br>(1.6)  | 0.8       | -86.1     |
|                            | Path2 | 134.8       | -28.8<br>(17.1)  | -134.1<br>(79.7) | -5.3<br>(3.2)  | 9.1       | -24.3     |
| $B_{12}Xe_{12}F_{12}^{2-}$ | Path1 | 276.0       | -137.6<br>(41.0) | -188.0<br>(56.0) | -10.2<br>(3.0) | 1.5       | -58.4     |
|                            | Path2 | 233.5       | -109.6<br>(34.1) | -201.8<br>(62.7) | -10.2<br>(3.2) | 11.1      | -77.2     |

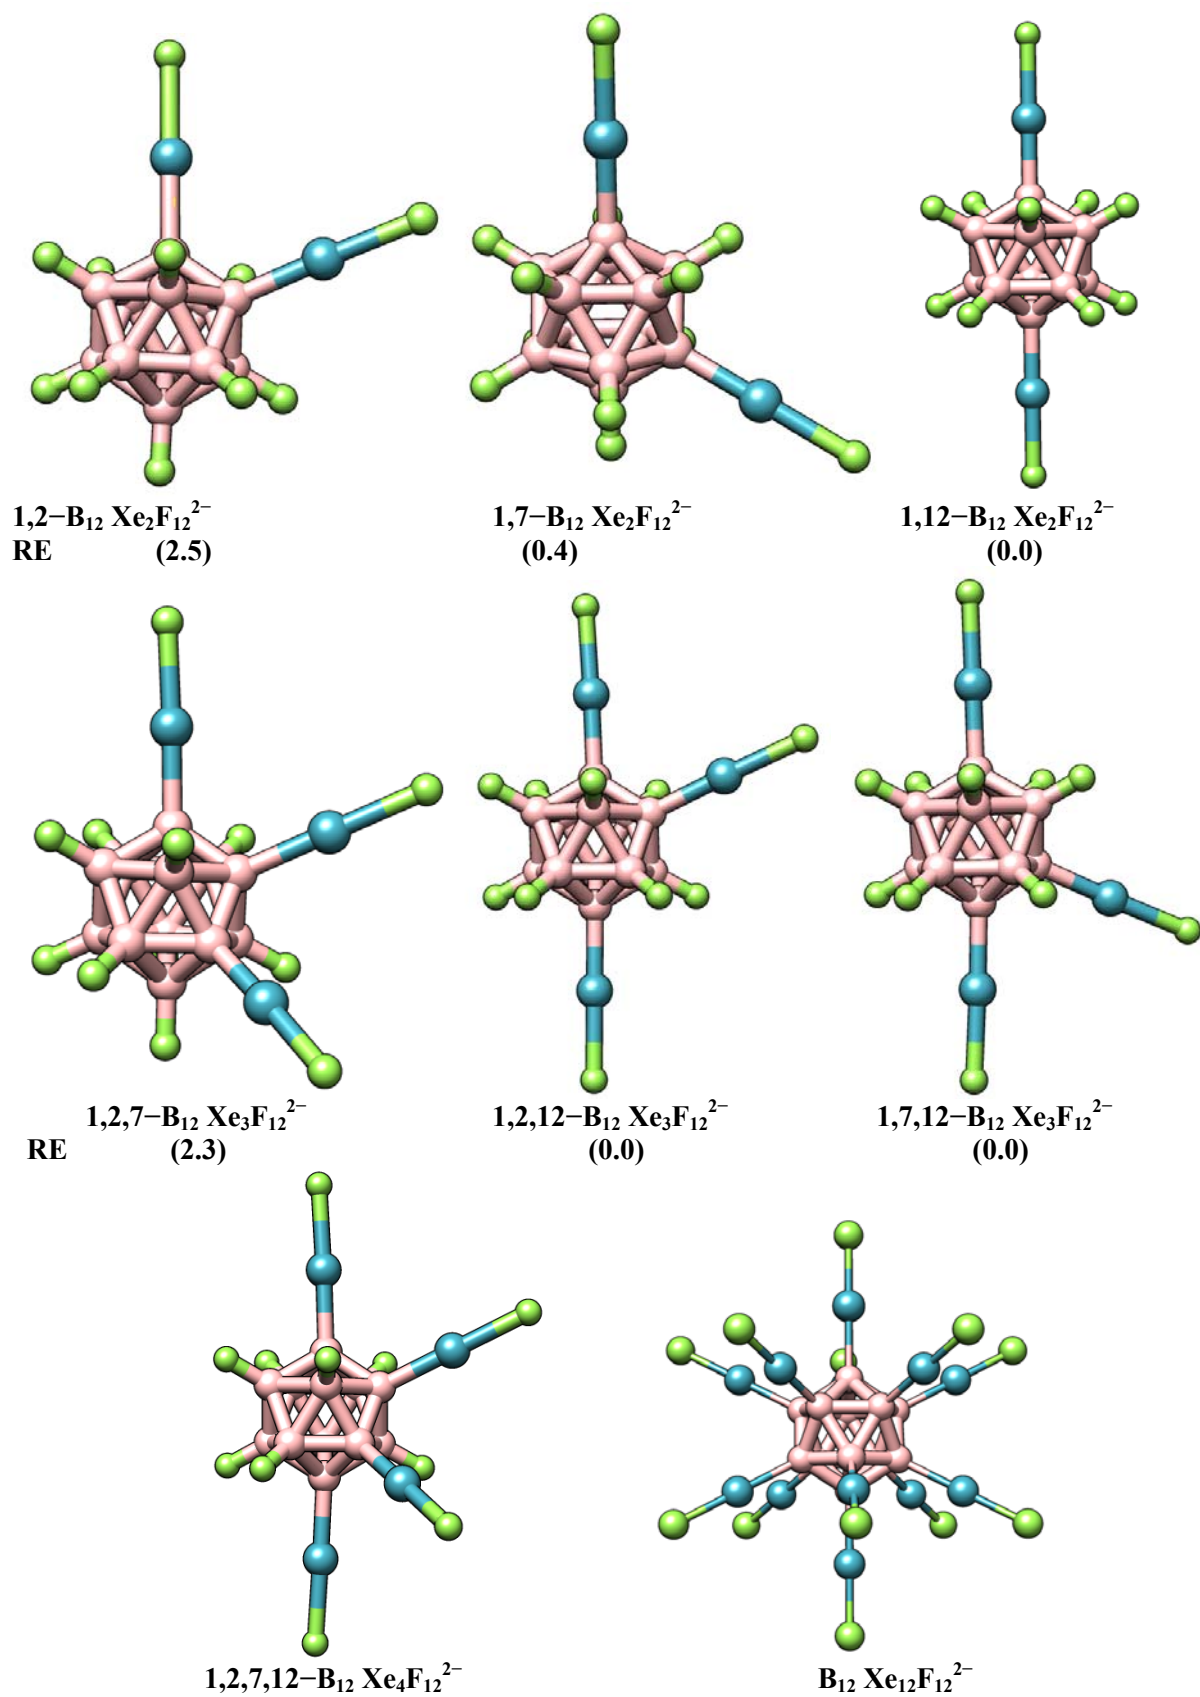

**Figure S1.** Optimized Structures of  $\text{B}_{12}\text{Xe}_n\text{F}_{12}^{2-}$  ( $n = 2-4, 12$ ) compound and relative energy (RE, in  $\text{kcal mol}^{-1}$ ) of different isomers with respect to its corresponding most stable isomer.

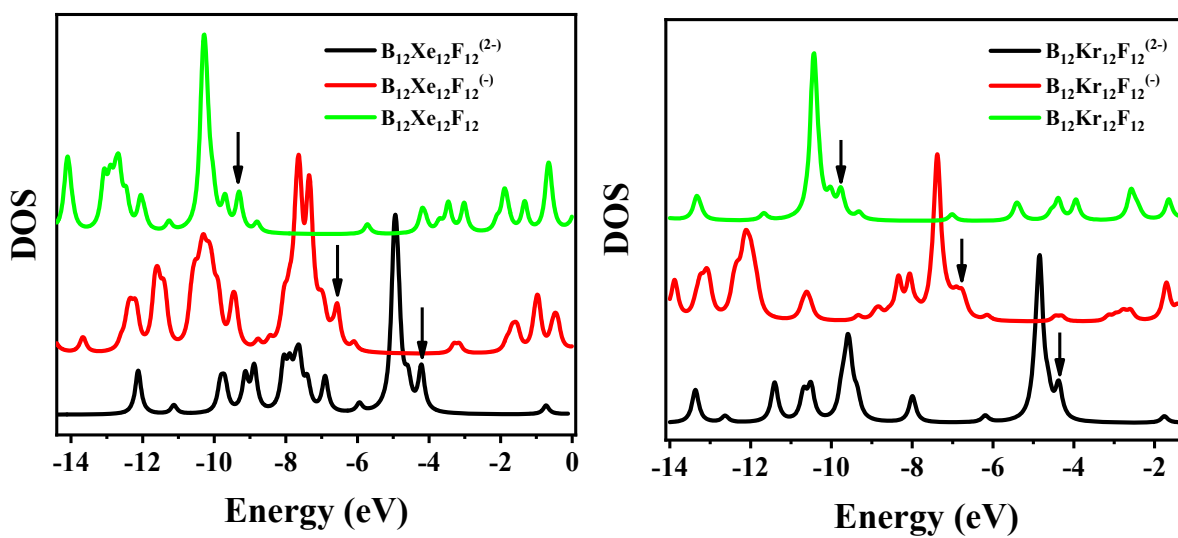

Figure S2. DOS of B<sub>12</sub>Xe<sub>12</sub>F<sub>12</sub><sup>2-/0</sup> and B<sub>12</sub>Kr<sub>12</sub>F<sub>12</sub><sup>2-/0</sup> systems using B3LYP-D3/def2-TZVPP method. Vertical arrows are pointing toward HOMO.



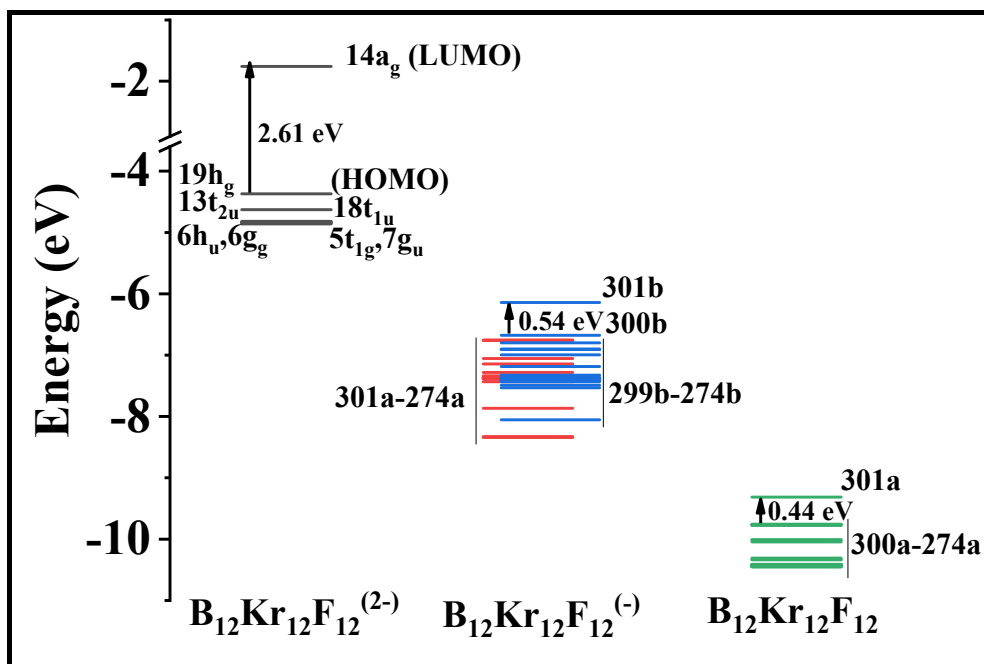

Figure S3. MOs energy level diagram of  $B_{12}Kr_{12}F_{12}^{2-/0}$  using B3LYP-D3/def2-TZVPP method. The red and blue lines correspond to the alpha and beta orbitals respectively, of  $B_{12}Kr_{12}F_{12}^{(-)}$  system.

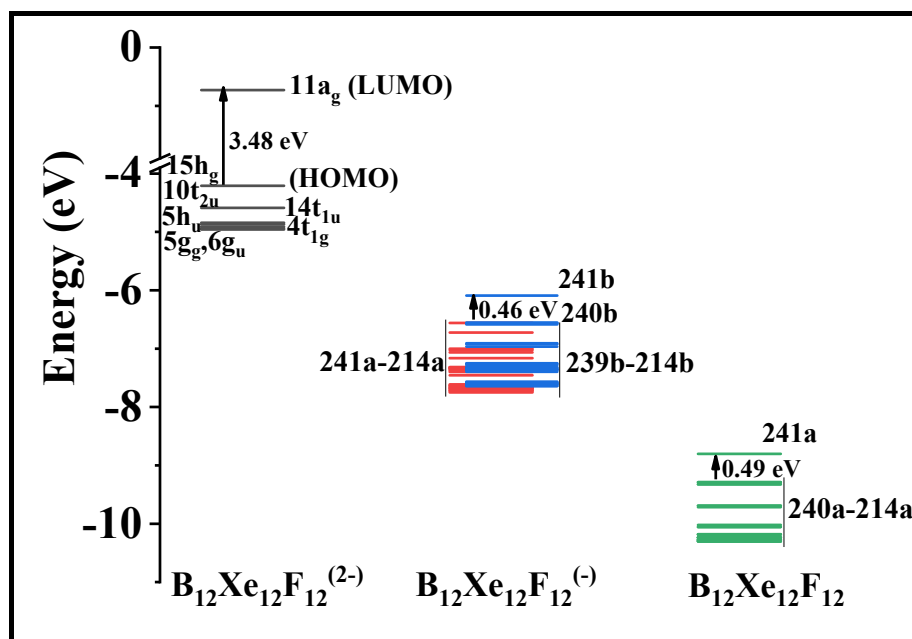

Figure S4. MOs energy level diagram of  $B_{12}Xe_{12}F_{12}^{2-/0}$  using B3LYP-D3/def2-TZVPP method. The red and blue lines correspond to the alpha and beta orbitals respectively, of  $B_{12}Xe_{12}F_{12}^{(-)}$  system.

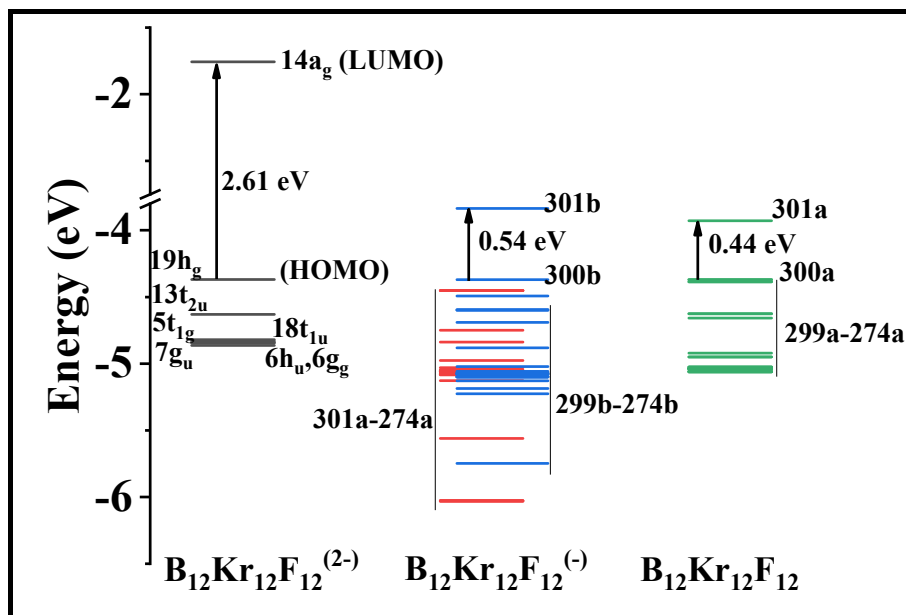

Figure S5. Scaled MOs energy level diagram of  $B_{12}Kr_{12}F_{12}^{2-/0}$  using B3LYP-D3/def2-TZVPP method. The red and blue lines correspond to the alpha and beta orbitals respectively, of  $B_{12}Kr_{12}F_{12}^{(-)}$  system. The orbital energies of the negative and neutral systems are scaled by keeping the energy of the highest occupied molecular orbitals (HOMO) of  $B_{12}Kr_{12}F_{12}^{(-)}$  and  $B_{12}Kr_{12}F_{12}$  to that of the HOMO of  $B_{12}Kr_{12}F_{12}^{2-}$  system.

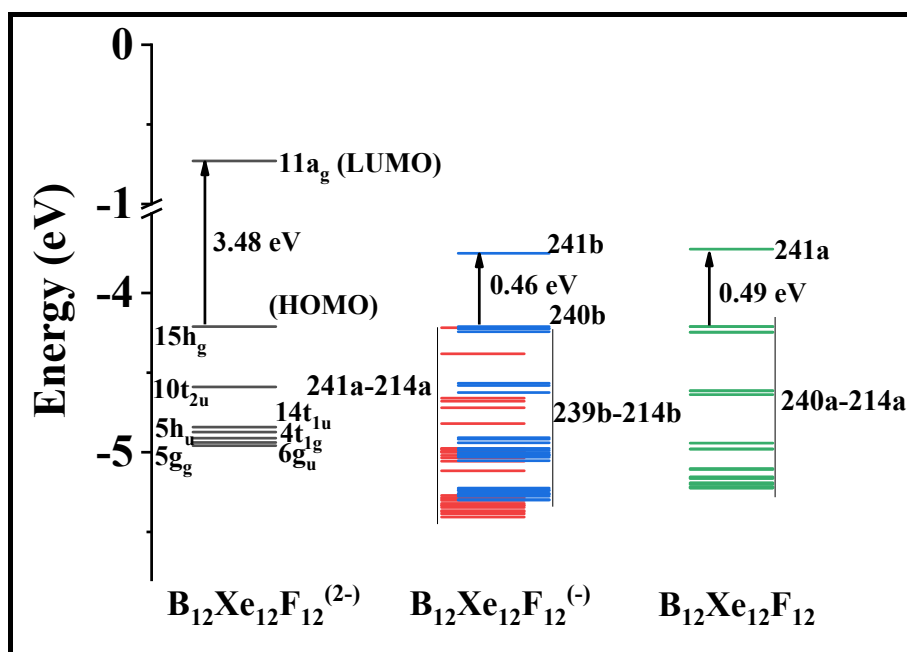

Figure S6. Scaled MOs energy level diagram of  $B_{12}Xe_{12}F_{12}^{2-/0}$  using B3LYP-D3/def2-TZVPP method. The red and blue lines correspond to the alpha and beta orbitals respectively, of  $B_{12}Xe_{12}F_{12}^{(-)}$  system. The orbital energies of the negative and neutral systems are scaled by keeping the energy of the highest occupied molecular orbitals (HOMO) of  $B_{12}Xe_{12}F_{12}^{(-)}$  and  $B_{12}Xe_{12}F_{12}$  to that of the HOMO of  $B_{12}Xe_{12}F_{12}^{2-}$  system.

|                                                                                                 |  |  |                                                                       |  |  |
|-------------------------------------------------------------------------------------------------|--|--|-----------------------------------------------------------------------|--|--|
| $B_{12}Kr_{12}F_{12}^{(2-)}$                                                                    |  |  | $B_{12}Kr_{12}F_{12}^{(-)}$                                           |  |  |
|                                                                                                 |  |  |                                                                       |  |  |
| 14a <sub>g</sub> (LUMO)<br>[B(s)+F(p)+Kr(p)]                                                    |  |  | 301b (LUMO)<br>[B(s,p)+F(p)+Kr(s)]                                    |  |  |
|                                                                                                 |  |  |                                                                       |  |  |
| 19h <sub>g</sub> -1 (HOMO)    19h <sub>g</sub> -2    19h <sub>g</sub> -3<br>[B(s,p)+F(p)+Kr(s)] |  |  | 300b (HOMO)    301a (SOMO)    299a<br>[B(s,p)+F(p)+Kr(s)]             |  |  |
|                                                                                                 |  |  |                                                                       |  |  |
| 19h <sub>g</sub> -4    19h <sub>g</sub> -5<br>[B(s,p)+F(p)+Kr(s)]                               |  |  | 298a    297a    296a<br>[B(s,p)+F(p)+Kr(s)]                           |  |  |
|                                                                                                 |  |  |                                                                       |  |  |
| 13t <sub>2u</sub> -1    13t <sub>2u</sub> -2    13t <sub>2u</sub> -3<br>[B(s)+F(p)+Kr(s)]       |  |  | 295a    294a    293a<br>[B(s,p)+F(p)+Kr(s)]    [F(p)]    [F(p)+Kr(p)] |  |  |
|                                                                                                 |  |  |                                                                       |  |  |
| 18t <sub>1u</sub> -1    18t <sub>1u</sub> -2    18t <sub>1u</sub> -3<br>[B(s,p)+F(p)]           |  |  | 292a    291a    290a<br>[F(p)+Kr(p)]                                  |  |  |

Figure S7. MOs pictures of lowest unoccupied molecular orbital (LUMO), highest occupied molecular orbital (HOMO), singly occupied molecular orbital (SOMO) and additional 10 outer valence occupied molecular orbitals of  $B_{12}Kr_{12}F_{12}^{(2-)}$  and  $B_{12}Kr_{12}F_{12}^{(-)}$  systems using B3LYP-D3/def2-TZVPP method.

| $B_{12}Kr_{12}F_{12}^{(-)}$                   | $B_{12}Kr_{12}F_{12}$              |
|-----------------------------------------------|------------------------------------|
|                                               |                                    |
| 301b (LUMO)<br>[B(s,p)+F(p)+Kr(s)]            | 301a (LUMO)<br>[B(s,p)+F(p)+Kr(s)] |
|                                               |                                    |
| 300b (HOMO)    301a (SOMO)    299a            | 300a (HOMO)    299a    298a        |
| [B(s,p)+F(p)+Kr(s)]                           | [B(s,p)+F(p)+Kr(s)]                |
|                                               |                                    |
| 298a    297a    296a                          | 297a    296a    295a               |
| [B(s,p)+F(p)+Kr(s)]                           | [B(s,p)+F(p)+Kr(s)]                |
|                                               |                                    |
| 295a    294a    293a                          | 294a    293a    292a               |
| [B(s,p)+F(p)+Kr(s)]    [F(p)]    [F(p)+Kr(p)] | [B(s,p)+F(p)+Kr(s)]                |
|                                               |                                    |
| 292a    291a    290a                          | 291a    290a                       |
| [F(p)+Kr(p)]                                  | [B(s,p)+F(p)+Kr(s)]    [F(p)]      |

Figure S8. MOs pictures of LUMO, HOMO, SOMO and additional 10 outer valence occupied molecular orbitals of  $B_{12}Kr_{12}F_{12}^{(-)}$  and  $B_{12}Kr_{12}F_{12}$  systems using B3LYP-D3/def2-TZVPP method.

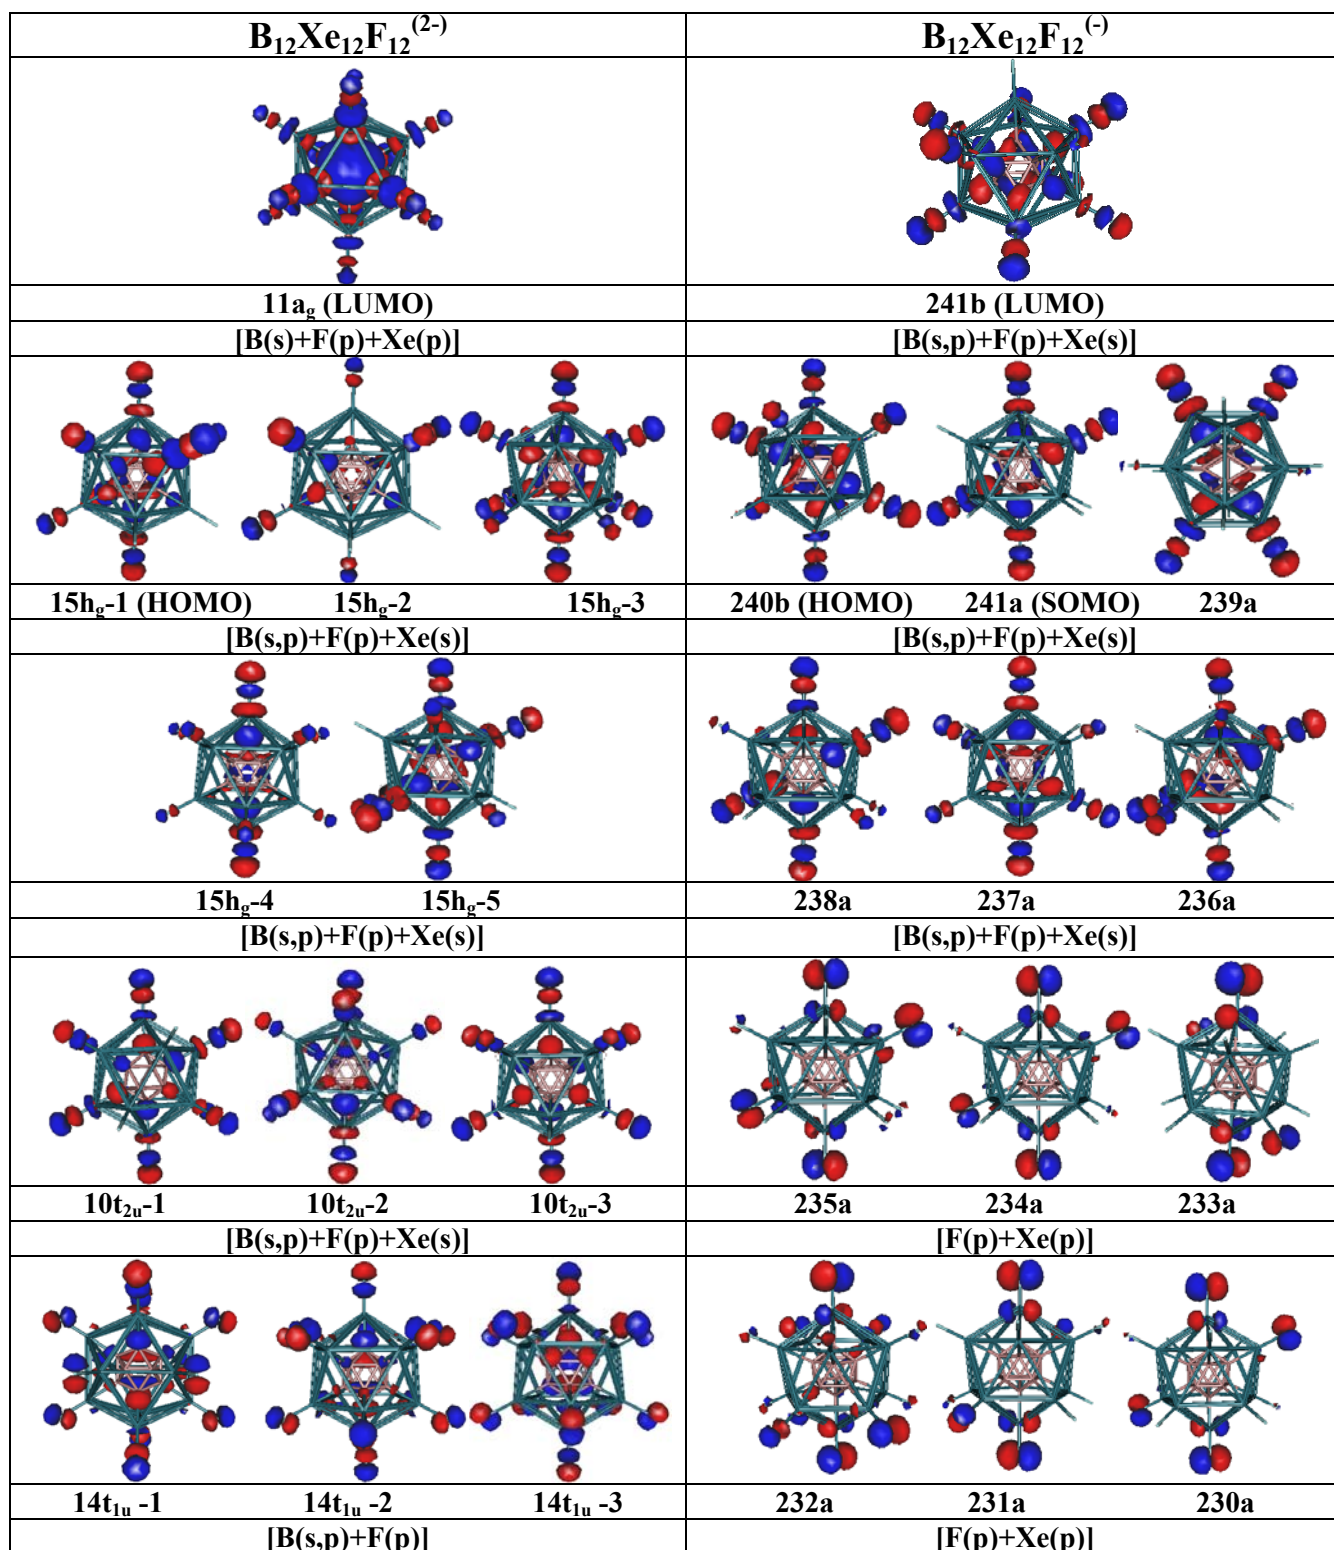

Figure S9. MOs pictures of LUMO, HOMO, SOMO and additional 10 outer valence occupied molecular orbitals of  $B_{12}Xe_{12}F_{12}^{(2-)}$  and  $B_{12}Xe_{12}F_{12}^{(-)}$  systems using B3LYP-D3/def2-TZVPP method.

| $B_{12}Xe_{12}F_{12}^{(-)}$  | $B_{12}Xe_{12}F_{12}$            |
|------------------------------|----------------------------------|
|                              |                                  |
| 241b (LUMO)                  | 241a (LUMO)                      |
| [B(s,p)+F(p)+Xe(s)]          | [B(s,p)+F(p)+Xe(s)]              |
|                              |                                  |
| 240b (HOMO) 241a (SOMO) 239a | 240a (HOMO) 239a 238a            |
| [B(s,p)+F(p)+Xe(s)]          | [B(s,p)+F(p)+Xe(s)]              |
|                              |                                  |
| 238a 237a 236a               | 237a 236a 235a                   |
| [B(s,p)+F(p)+Xe(s)]          | [B(s,p)+F(p)+Xe(s)]              |
|                              |                                  |
| 235a 234a 233a               | 234a 233a 232a                   |
| [F(p)+Xe(p)]                 | [B(s,p)+F(p)+Xe(s)]              |
|                              |                                  |
| 232a 231a 230a               | 231a 230a                        |
| [F(p)+Xe(p)]                 | [B(s,p)+F(p)+Xe(s)] [F(p)+Xe(p)] |

Figure S10. MOs pictures of LUMO, HOMO, SOMO and additional 10 outer valence occupied molecular orbitals of  $B_{12}Xe_{12}F_{12}^{(-)}$  and  $B_{12}Xe_{12}F_{12}$  systems using B3LYP-D3/def2-TZVPP method.

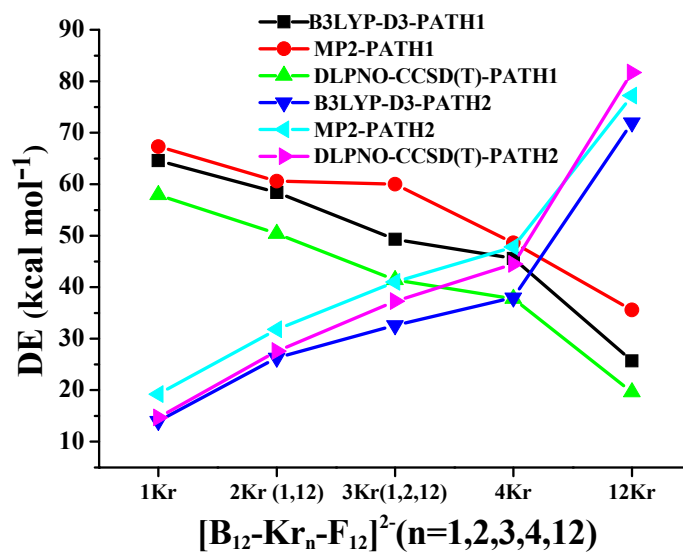

**Figure S11.** Dissociation energy (DE, kcal mol<sup>-1</sup>) plot of B<sub>12</sub>Kr<sub>n</sub>F<sub>12</sub><sup>2-</sup> (n = 1, 2, 3, 4, 12) along Path1 and Path2 dissociation channels using B3LYP-D3, MP2 and DLPNO-CCSD(T) methods with def2-TZVPP basis set.



| Path1 (Dianion+F+Ng) [ $E^{\text{orb}} = \sum \Delta E_i^{\text{orb}}$ ]<br>$\text{KrB}_{12}\text{F}_{12}^{2-}$ ( $E^{\text{orb}} = -168.5$ )                                                     | Path2 (Anion+F <sup>-</sup> +Ng) [ $E^{\text{orb}} = \sum \Delta E_i^{\text{orb}}$ ]<br>$\text{KrB}_{12}\text{F}_{12}^{2-}$ ( $E^{\text{orb}} = -111.6$ )             |
|---------------------------------------------------------------------------------------------------------------------------------------------------------------------------------------------------|-----------------------------------------------------------------------------------------------------------------------------------------------------------------------|
| 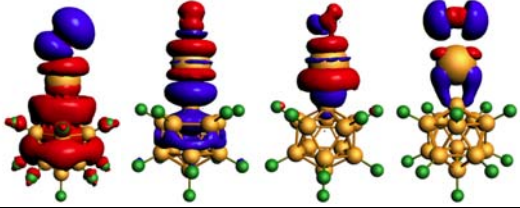<br>$\Delta E_i^{\text{orb}} = -132.9(\text{b}) \quad -15.3(\text{a}) \quad -9.5(\text{b}) \quad 0.22(\text{a})$ | <br>$\Delta E_i^{\text{orb}} = -89.3 \quad -4.4 \quad -5.3 \quad -5.3$              |
| <br>$\Delta E_i^{\text{orb}} = -1.0(\text{b}) \quad 0.3(\text{a}) \quad -1.6(\text{b}) \quad -0.8(\text{a})$     | <br>$\Delta E_i^{\text{orb}} = -3.1 \quad -0.45 \quad -0.45$                        |
| <br>$\Delta E_i^{\text{orb}} = -1.1(\text{b}) \quad -0.7(\text{a}) \quad -1.0(\text{b}) \quad -0.5(\text{a})$   | <br>$\Delta E_i^{\text{orb}} = -0.19 \quad -0.19$                                 |
| Path1 (Dianion+F+Ng) [ $E^{\text{orb}} = \sum \Delta E_i^{\text{orb}}$ ]<br>$\text{Kr}_{12}\text{B}_{12}\text{F}_{12}^{2-}$ ( $E^{\text{orb}} = -154.1$ )                                         | Path2 (Anion+F <sup>-</sup> +Ng) [ $E^{\text{orb}} = \sum \Delta E_i^{\text{orb}}$ ]<br>$\text{Kr}_{12}\text{B}_{12}\text{F}_{12}^{2-}$ ( $E^{\text{orb}} = -186.4$ ) |
| <br>$\Delta E_i^{\text{orb}} = -88.3(\text{b}) \quad -31.0(\text{a}) \quad -13.5(\text{b})$                    | <br>$\Delta E_i^{\text{orb}} = -146.9 \quad -10.8 \quad -6.4$                     |
| <br>$\Delta E_i^{\text{orb}} = -1.9(\text{a}) \quad -2.6(\text{b}) \quad -0.93(\text{a})$                      | <br>$\Delta E_i^{\text{orb}} = -8.5 \quad -8.5$                                   |
| <br>$\Delta E_i^{\text{orb}} = -2.8(\text{b}) \quad -2.7(\text{a}) \quad -2.2(\text{a})$                       | <br>$\Delta E_i^{\text{orb}} = -0.2 \quad -0.2$                                   |

**Figure S12.** Deformation density ( $\Delta\rho(r)$ ) pictures of the pairwise orbital interactions for  $\text{B}_{12}\text{Kr}_n\text{F}_{12}^{2-}$  ( $n = 1$  and  $12$ ) along Path1 and Path2 and their associated  $\Delta E_i^{\text{orb}}$  energies ( $\Delta E^{\sigma}$  and  $\Delta E^{\pi}$ , in  $\text{kcal mol}^{-1}$ ) obtained from the EDA–NOCV at B3LYP–D3/TZ2P level of theory. The blue and red colored surfaces indicate regions with  $\Delta\rho(r) > 0$  and  $\Delta\rho(r) < 0$ , respectively.

| Path1 (Dianion+F+Ng) [ $E^{\text{orb}} = \sum \Delta E_i^{\text{orb}}$ ]<br>$\text{XeB}_{12}\text{F}_{12}^{2-}$ ( $E^{\text{orb}} = -185.1$ )                                                       | Path2 (Anion+F <sup>-</sup> +Ng) [ $E^{\text{orb}} = \sum \Delta E_i^{\text{orb}}$ ]<br>$\text{XeB}_{12}\text{F}_{12}^{2-}$ ( $E^{\text{orb}} = -134.1$ ) |
|-----------------------------------------------------------------------------------------------------------------------------------------------------------------------------------------------------|-----------------------------------------------------------------------------------------------------------------------------------------------------------|
| 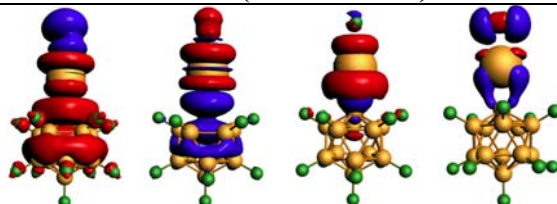<br>$\Delta E_i^{\text{orb}} = -144.0(\text{b}) \quad -19.1(\text{a}) \quad -11.0(\text{b}) \quad -0.31 \text{ a}$ | <br>$\Delta E_i^{\text{orb}} = -111.3 \quad -4.8 \quad -5.3 \quad -5.3$ |
| <br>$\Delta E_i^{\text{orb}} = -1.1(\text{b}) \quad -0.30(\text{a}) \quad -1.1(\text{b}) \quad -0.9(\text{a})$     | <br>$\Delta E_i^{\text{orb}} = -3.6 \quad -0.40 \quad -0.40$            |
| <br>$\Delta E_i^{\text{orb}} = -1.0(\text{b}) \quad -0.7(\text{a}) \quad -0.7(\text{a}) \quad -1.0(\text{a})$      | <br>$\Delta E_i^{\text{orb}} = -0.48 \quad -0.48$                       |
| <br>$\Delta E_i^{\text{orb}} = -116.2(\text{b}) \quad -36.8(\text{a}) \quad -13.3(\text{b})$                     | <br>$\Delta E_i^{\text{orb}} = -161.5 \quad -8.1 \quad -8.0$          |
| <br>$\Delta E_i^{\text{orb}} = -2.0(\text{a}) \quad -2.7(\text{b}) \quad -1.1(\text{a})$                         | <br>$\Delta E_i^{\text{orb}} = -9.3 \quad -9.3 \quad -0.5$            |
| <br>$\Delta E_i^{\text{orb}} = -3.3(\text{b}) \quad -2.9(\text{a})$                                              | <br>$\Delta E_i^{\text{orb}} = -0.5$                                 |

**Figure S13.** Deformation density ( $\Delta\rho(r)$ ) pictures of the pairwise orbital interactions for  $\text{B}_{12}\text{Xe}_n\text{F}_{12}^{2-}$  ( $n = 1$  and  $12$ ) along Path1 and Path2 and their associated  $\Delta E_i^{\text{orb}}$  energies ( $\Delta E^{\sigma}$  and  $\Delta E^{\pi}$ , in  $\text{kcal mol}^{-1}$ ) obtained from the EDA–NOCV at B3LYP–D3/TZ2P level of theory. The blue and red colored surfaces indicate regions with  $\Delta\rho(r) > 0$  and  $\Delta\rho(r) < 0$ , respectively.
